# Prediction of Bispectral Index during Target-controlled Infusion of Propofol and Remifentanyl

## A Deep Learning Approach

Hyung-Chul Lee, M.D., Ho-Geol Ryu, M.D., Ph.D., Eun-Jin Chung, M.D., Chul-Woo Jung, M.D., Ph.D.

### ABSTRACT

**Background:** The discrepancy between predicted effect-site concentration and measured bispectral index is problematic during intravenous anesthesia with target-controlled infusion of propofol and remifentanyl. We hypothesized that bispectral index during total intravenous anesthesia would be more accurately predicted by a deep learning approach.

**Methods:** Long short-term memory and the feed-forward neural network were sequenced to simulate the pharmacokinetic and pharmacodynamic parts of an empirical model, respectively, to predict intraoperative bispectral index during combined use of propofol and remifentanyl. Inputs of long short-term memory were infusion histories of propofol and remifentanyl, which were retrieved from target-controlled infusion pumps for 1,800 s at 10-s intervals. Inputs of the feed-forward network were the outputs of long short-term memory and demographic data such as age, sex, weight, and height. The final output of the feed-forward network was the bispectral index. The performance of bispectral index prediction was compared between the deep learning model and previously reported response surface model.

**Results:** The model hyperparameters comprised 8 memory cells in the long short-term memory layer and 16 nodes in the hidden layer of the feed-forward network. The model training and testing were performed with separate data sets of 131 and 100 cases. The concordance correlation coefficient (95% CI) were 0.561 (0.560 to 0.562) in the deep learning model, which was significantly larger than that in the response surface model (0.265 [0.263 to 0.266],  $P < 0.001$ ).

**Conclusions:** The deep learning model–predicted bispectral index during target-controlled infusion of propofol and remifentanyl more accurately compared to the traditional model. The deep learning approach in anesthetic pharmacology seems promising because of its excellent performance and extensibility. (ANESTHESIOLOGY 2018; 128:492-501)

TOTAL intravenous anesthesia (TIVA) using target-controlled infusion of propofol is widely used for anesthesia and sedation. Target-controlled infusion is performed using a computer-assisted infusion pump that calculates the amount of propofol needed to rapidly achieve the target plasma concentration or the effect-site concentration ( $C_e$ ) of propofol, which is predicted by three-compartment pharmacokinetic (PK) and pharmacodynamic (PD) models.<sup>1,2</sup> During target-controlled infusion, the propofol  $C_e$  is assumed to correlate with the level of hypnosis. However, the bispectral index (BIS), the most widely used measure of hypnosis, does not always agree with the model-driven  $C_e$  of propofol, especially during anesthesia induction and recovery.<sup>3</sup>

The discrepancy between the predicted  $C_e$  of propofol and the measured hypnotic effect is believed to be related to PK–PD modeling. A PK model with a limited number of compartments and covariates may be insufficient to accurately account for propofol kinetics.<sup>4</sup> The effect measures adopted in PD models are different from those used in clinical practice such as BIS.<sup>5</sup> In addition, the synergistic effect of remifentanyl on hypnosis is not considered when using the propofol and remifentanyl target-controlled infusions.

### What We Already Know about This Topic

- The combined effects of propofol and remifentanyl on the bispectral index have been characterized using isobole and response surface models
- Deep learning is a kind of machine learning based on a set of algorithms to model high-level abstractions in data using multiple linear and nonlinear transformations

### What This Article Tells Us That Is New

- An empirical model was developed from propofol and remifentanyl dosing histories and demographic data to predict bispectral index during total intravenous anesthesia target-controlled infusions using a deep learning approach
- The deep learning model had less error in predicting bispectral index during anesthesia induction, maintenance, and recovery periods than the response surface model
- The generalizability of the deep learning model is very dependent on the training data set

Finally, the traditional PK–PD models built using a small number of study participants in a limited experimental setting lack the capacity for a variety of surgical situations.

The discrepancy between predicted BIS and measured BIS during TIVA could be minimized if the actual clinical

This article is featured in “This Month in Anesthesiology,” page 1A. Corresponding article on page 431. Supplemental Digital Content is available for this article. Direct URL citations appear in the printed text and are available in both the HTML and PDF versions of this article. Links to the digital files are provided in the HTML text of this article on the Journal’s Web site ([www.anesthesiology.org](http://www.anesthesiology.org)).

Submitted for publication February 12, 2017. Accepted for publication August 23, 2017. From the Department of Anesthesiology and Pain Medicine, Seoul National University College of Medicine, Seoul National University Hospital, Seoul, Korea.

Copyright © 2018, the American Society of Anesthesiologists, Inc. Wolters Kluwer Health, Inc. All Rights Reserved. Anesthesiology 2018; 128:492-501

data are adequately interpreted.<sup>6,7</sup> However, clinical big data with many noise signals and hidden confounders are not easily analyzed using traditional PK–PD modeling tools. We hypothesized that deep learning, a type of machine learning based on a set of algorithms to model high level abstractions in represented data using multiple linear and nonlinear transformations, could better interpret the dose–response relationship of anesthetic drugs represented in clinical data. Deep learning has recently gained attention as a tool for solving complex issues that were too complicated to analyze using conventional statistical/mathematical methods without overfitting.<sup>8</sup> The main goal of this study is to build an empirical model that predicts changes in BIS during the target-controlled infusions of propofol and remifentanyl better than the traditional mechanistic PK–PD model through a deep learning approach.

## Materials and Methods

### Case Selection

The data were retrieved from our registry that stores basic information and vital signs data of surgical patients in our institution. The registry construction was approved by the institutional review board of Seoul National University Hospital (Seoul, Korea; approval No. H-1408-101-605) and registered at publicly accessible clinical trial registration site (ClinicalTrials.gov, NCT02914444). The retrospective use of registry data for the current study was additionally approved (H-1610-057-798) by the institutional review board. The data from patients who underwent general surgery between June 2016 and September 2016 were assessed. TIVA cases without any anesthetic adjuncts were enrolled after review of registry data.

### Practice of TIVA

During the study period, the choice of TIVA and volatile anesthesia was at the discretion of the on-duty anesthesiologist. Patients did not receive premedication. Routine monitoring such as electrocardiogram, noninvasive blood pressure, pulse oximetry, and BIS monitor (BIS VISTA; Medtronic, Ireland) was applied to patients before anesthesia induction. Effect-site target-controlled infusion of propofol and remifentanyl was used for induction and maintenance of anesthesia. Use of the Schnider *et al.*<sup>2</sup> or modified Marsh *et al.*<sup>1</sup> model for propofol target-controlled infusion was at the discretion of the attending anesthesiologist. The Minto *et al.*<sup>9</sup> model was used for remifentanyl target-controlled infusion. Target Ce values of propofol and remifentanyl were set at 3 to 5 µg/ml and 4 to 6 ng/ml, respectively, during anesthesia induction. After loss of response to verbal command, rocuronium (0.6 to 1.2 mg/kg) was administered to facilitate tracheal intubation. Mechanical ventilation was maintained with a tidal volume of 6 to 8 ml/kg and respiratory rate of 10 to 20/min. Propofol target Ce was titrated to keep the BIS between 40 and 60, and the remifentanyl target was adjusted in response to systemic blood pressure during anesthesia

maintenance. Rocuronium (0.15 mg/kg) was intermittently administered to maintain neuromuscular block during surgery. At the end of surgery, reversal of neuromuscular block was performed with neostigmine (0.04 mg/kg) and glycopyrrolate (0.01 mg/kg). Propofol and remifentanyl administrations were stopped, and the patient was awakened by prodding and calling in a loud tone when BIS increased beyond 60. Extubation was done immediately after notice of sufficient spontaneous ventilation indicated by negative inspiration pressure less than –20 mmHg. Patients recovered from anesthesia were transferred to the postanesthesia care unit or the intensive care unit.

### Data Collection

Vital signs data in the registry were recorded with the Vital Recorder program, which was developed by the authors for recording of time-synced data from multiple anesthesia devices including patient monitor, anesthesia machine, BIS monitor, cardiac output monitor, and target-controlled infusion pumps (the program is freely downloadable from the website, <https://vitaldb.net>; accessed September 1, 2017). Among the collected variables in the registry, demographic data (age, sex, weight, and height), BIS data, and propofol and remifentanyl target-controlled infusion data were used. The BIS data were BIS values and signal quality index collected from BIS VISTA at 1-s intervals. Propofol and remifentanyl data included cumulative infusion volumes and Ce values of two drugs retrieved from target-controlled infusion pump (Orchestra Base Primea with module DPS; Fresenius Kabi AG, Germany) at an interval of 1 s.

Visual inspection of target-controlled infusion and BIS data was conducted for the period from the start of propofol or remifentanyl infusion to the end of BIS measurement. The following cases were excluded: (1) volatile anesthetic was additionally used during TIVA, (2) BIS less than 80 was observed at the start of drug infusion, (3) more than 300 s of data loss was observed, (4) the cumulated infusion volume was not 0 when the first BIS value was recorded, and (5) target-controlled infusion pump was incidentally reset during anesthesia.

### Data Preparation

The data of selected cases were randomly allocated to three sets of data: training, validation, and testing data sets. Both the training and validation data sets were used for modeling. The testing data set is the remaining cases not used for modeling but was used to test the performance of the final model.<sup>10</sup>

Input variables of the deep learning model included the PK–PD covariates (age, sex, weight, and height) and propofol and remifentanyl infusion histories. The output was BIS value. Data preprocessing such as normalization of input data and smoothing of BIS values was performed before modeling. Age, sex, weight, and height were normalized with mean and SD of the training data set.

Preprocessing of propofol and remifentanyl infusion histories data was performed with training and validation data in terms

of dose normalization and time range setting. The original infusion history data retrieved from the target-controlled infusion pump were the accumulated infusion volumes that are updated every 10 s according to the target-controlled infusion algorithm by Shafer and Gregg.<sup>11</sup> The 10-s doses of two drugs were calculated from the infused volumes and drug concentrations. As the maximum infusion rate of target-controlled infusion pump was set at 500 ml/h, the maximum 10-s doses of propofol and remifentanyl were 27.8 mg and 27.8 µg. Normalization was performed by dividing the 10-s dose by 12 to meet the 10-s dose between 0 and 2.5, which is the maximum input value without saturation in hard-sigmoid function in machine learning. The time range of data was determined considering the context-sensitive decrement time of propofol. If we assume that hypnosis is maintained at propofol  $C_e$  of 3 µg/ml during surgery and the patient recovers at 1 µg/ml, the calculated 66% decrement time will be 25 min after 3 h of propofol infusion according to the modified Marsh model.<sup>12</sup> We assumed that at least 1,800 s of data (180 data points) were required to track the cumulative effect of propofol on BIS values during the recovery period. The infusion history of remifentanyl was also calculated for 1,800 s to account for the hypnotic synergy of remifentanyl.

Selection and smoothing were performed for BIS values of the training data set. BIS values with signal quality index greater than 50 were selected, and then locally weighted scatterplot smoothing (LOWESS) with smoothing parameter 0.03 was applied to the original BIS values to reduce calculation error during training.<sup>13</sup> The unprocessed BIS value was used for validation and testing data sets. Because the BIS is an indexed value between 0 and 100, the value was normalized to 0 to 1 by dividing the BIS value by 100.

### Model Building

The empirical model consisted of two neural networks such as long short-term memory and feed-forward neural network, which were sequentially connected to simulate a linked PK-PD model of propofol (fig. 1). A grid search method was used to optimize the hyperparameter, the numbers of memory cells and nodes in the neural networks. A total of 18 combinations (the number of memory cells in long short-term memory = 2, 4, 6, 8, 10, and 12; the number of nodes in the hidden layer = 8, 16, and 32) were tested by applying a fivefold cross-validation technique. Thereafter, the combination of 8 memory cells and 16 nodes representing the smallest validation error was selected as the fixed model architecture to train the deep learning model (fig. 2).

Time series data of propofol were input to 8 memory cells of the long short-term memory. Each memory cell in the long short-term memory served as a compartment of the PK model and calculated the amount of propofol to vary in the compartments using the propofol infusion history. Remifentanyl had the same long short-term memory structure as propofol. Outputs of propofol and remifentanyl from long short-term memory layer, as well as four covariates, were the inputs of the feed-forward neural network. The feed-forward

neural network was constructed with 1 input layer (8 input nodes for propofol, 8 input nodes for remifentanyl, and 4 input nodes for covariates), 1 hidden layer (16 nodes), and 1 output layer (1 output node of BIS value) to simulate two interacting PD models of propofol and remifentanyl. The activation functions used were hard sigmoid, hyperbolic tangent, rectified linear unit, and sigmoid functions for gate units of long short-term memory, memory cell of long short-term memory, hidden layer of feed-forward neural network and output layer of feed-forward neural network, respectively.

During training, weights of nodes were calculated with ADAM optimizer, a gradient descent optimization algorithm (<https://arxiv.org/abs/1412.6980>; accessed July 23, 2015). Selection of an optimal model without overfitting was performed using the training and validation data sets. In general, the model is trained to find the optimal weights of the nodes using the training data set during one training epoch. The trained model is then applied to the validation data set to calculate the validation error, which is the absolute difference between the model predicted BIS and the measured BIS. The validation errors gradually decrease as the training epoch repeats; however, the errors paradoxically increase when overfitting occurs. Therefore, model selection is made when the validation error is at its nadir. The final model was applied to the testing data set for external validation. The learning was performed with the authors' own program written in the Python language using the Keras library (<https://github.com/fchollet/keras>; accessed October 21, 2016). A workstation with Xeon CPU (E3-1230V5; Intel Corporation, USA) and Nvidia GTX 1080 GPU (GeForce GTX 1080 G1; GIGA-BYTE Technology Co., Ltd., Taiwan) was used for the deep learning.

### BIS Prediction by Response Surface Model

The model performance was compared between the deep learning model and previously reported response surface model. The response surface model predicted BIS was calculated by the equation of Short *et al.*,<sup>14</sup> which is based on the modified hierarchy model of Bouillon *et al.*<sup>15</sup> that measures combined effect of propofol and remifentanyl on hypnosis. The input for the response surface model were propofol  $C_e$  and remifentanyl  $C_e$ , which were calculated by either the Schnider or the modified Marsh model and the Minto model, respectively, and directly recorded from the target-controlled infusion pump.

### Statistical Analysis

Descriptive statistics were used to describe demographics, BIS, and drug use in the training, validation, and testing groups. The performance of BIS prediction was compared between the deep learning model and the response surface model using the testing data set. The model fit was summarized with Lin's<sup>16</sup> concordance correlation coefficient, which evaluates the precision and accuracy between two measurements at the same time. In addition, comparisons were performed separately for the induction (from the start of

**A Traditional PK-PD model**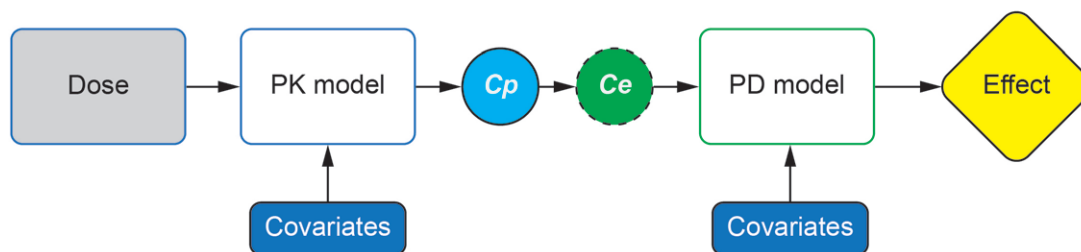**Deep learning model**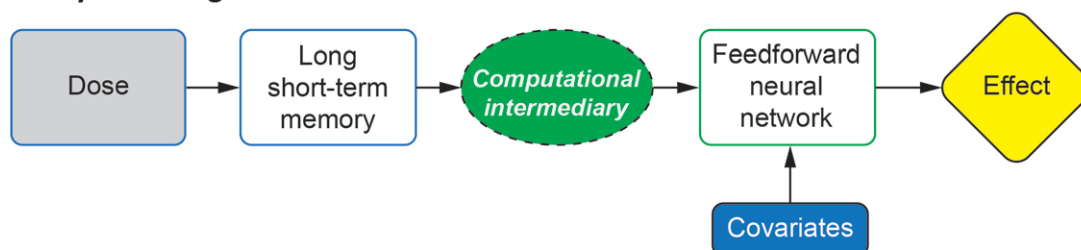**B**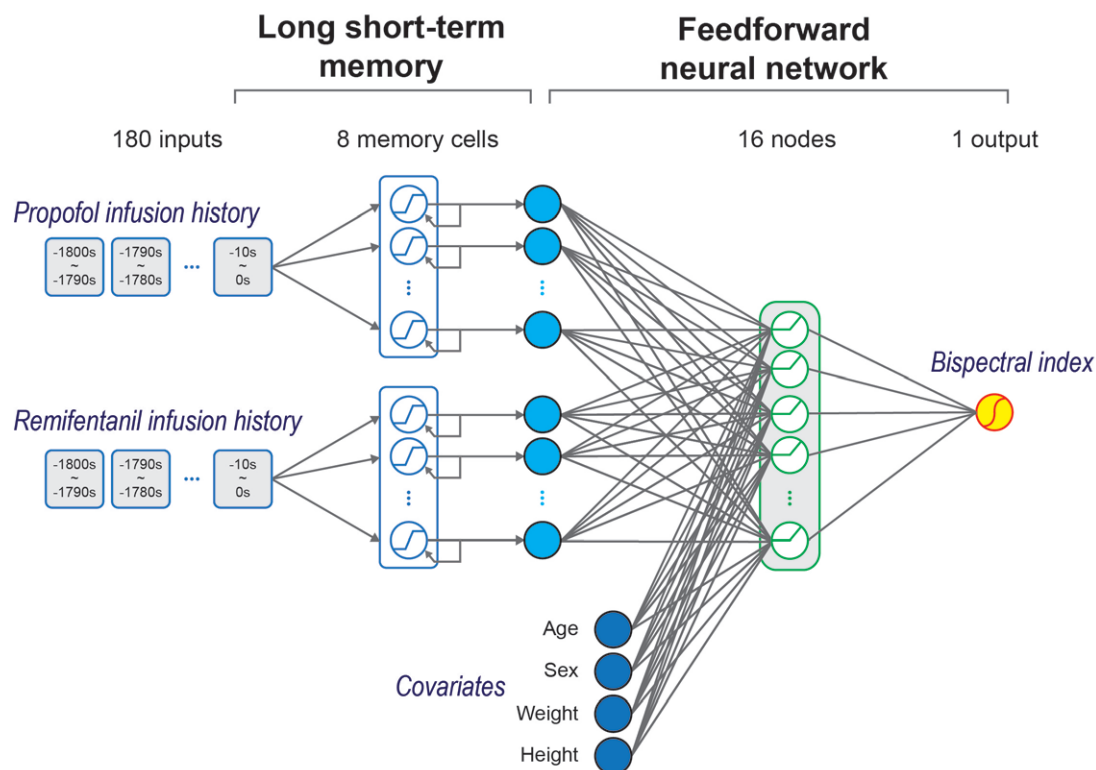

**Fig. 1.** Schematic representation of the deep learning model. (A) The traditional PK (pharmacokinetic)–pharmacodynamic (PD) model requires a PK–PD intermediary like plasma concentration ( $C_p$ ) or effect-site concentration ( $C_e$ ). The model has covariates in the PK part to enhance  $C_p$  to  $C_e$  relationship and in the PD part illustrating  $C_e$  to effect relationship. However, the deep learning model is designed to calculate computational intermediaries and has covariates input in the feed-forward neural network (virtual PD) part only. (B) Structure of deep learning model. Deep learning model of propofol and remifentanyl is built to predict bispectral index during anesthesia. Long short-term memory and feed-forward neural network are sequenced to model the linked PK–PD and interaction of propofol and remifentanyl. The inputs are infusion histories of propofol and remifentanyl and covariates like age, sex, weight, and height, and the output is the bispectral index.



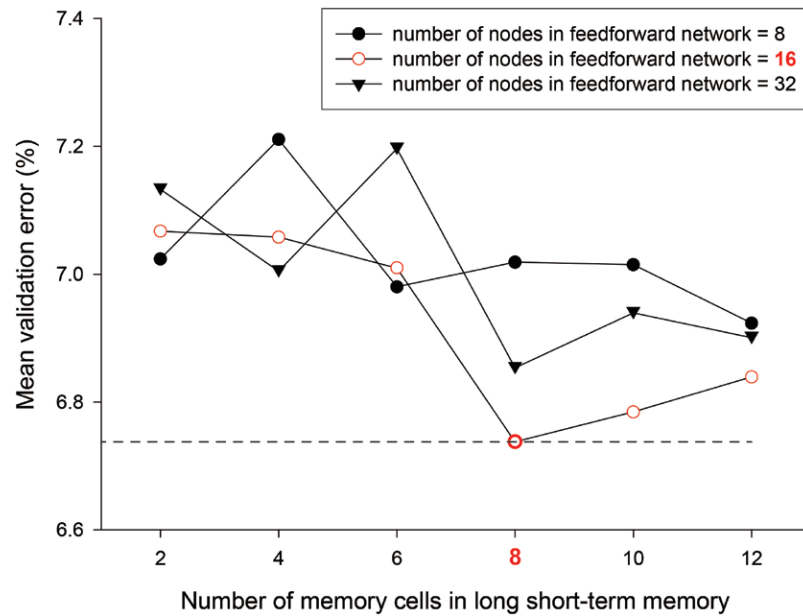

**Fig. 2.** Results of hyperparameter optimization with fivefold cross-validation. A grid search method was used for hyperparameter optimization. A total of 18 combinations have been tested for the number of memory cells in long short-term memory and the number of nodes in the hidden layer of feed-forward neural network. The combination representing the smallest validation error was selected as the hyperparameter of the model (8 memory cells and 16 nodes).

propofol infusion to 10 min later), maintenance, and recovery (from the stop of propofol infusion to the end of anesthesia) periods of anesthesia. The method of performance measurement was used for comparison.<sup>17</sup> Performance error (PE) was calculated as  $([\text{measured BIS} - \text{predicted BIS}]/\text{predicted BIS})$ . Median performance error (MDPE) and median absolute performance error (MDAPE) are the median of PE and median of absolute PE during anesthesia periods, respectively. Root mean square error (RMSE) is the square root of the mean square error and represents the sample SD of the differences between predicted and measured BIS values. MDPE, MDAPE, and RMSE were compared between two models using paired *t* test.

The data are expressed as means  $\pm$  SD (range) or absolute numbers. Statistical analysis was performed with SPSS 21 (IBM, USA), and  $P < 0.05$  was considered significant.

## Results

The number of cases in the registry was 1,223 during the study period, and 417 (34.1%) cases were performed with TIVA. After exclusion, 231 cases were selected, and 101, 30, and 100 cases were assigned to the training, validation, and testing groups, respectively. The general characteristics of the three groups are described in table 1.

The total number of data points were 2,038,389 (927,104 for training data set, 219,723 for validation data set, and 89,562 for testing data set). The time required for building a deep learning model was on average about 1.8 h. The final model had 6.23 training error and 6.46 validation error as a BIS value.

The concordance correlation coefficient (95% CI) were 0.561 (0.560 to 0.562) in the deep learning model, which was significantly larger than that in the response surface model (0.265 [0.263 to 0.266];  $P < 0.001$ ). The Pearson correlation coefficient (measure of precision) and bias correction factor (measure of accuracy) were 0.622 and 0.902 for the deep learning model and 0.378 and 0.701 for the response surface model.

MDPE, MDAPE, and RMSE of deep learning model were significantly smaller than those of response surface model during all periods of anesthesia ( $P < 0.001$ ; table 2). Figure 3 shows the PEs of both the deep learning and the response surface models during the three anesthesia periods in all cases. The PE of the response surface model shows more negative deviation during induction period and more positive deviation with larger range during maintenance and recovery periods compared to those of the deep learning model. Supplemental Digital Content 1 (<http://links.lww.com/ALN/B542>) shows the individual plots of the measured and model-predicted BIS values in 100 testing group cases. The cases with the smallest and largest prediction errors are selected and shown in figure 4.

The weight matrix of the final model are provided in Excel format in Supplemental Digital Content 2 (<http://links.lww.com/ALN/B543>). A machine-readable weight matrix in hierarchical data format (HDF), the program code written in the Python language, and the raw data file in comma-separated values (CSV) format are accessible from the publicly open data repository (<https://osf.io/d8gs2>; accessed September 1, 2017).

**Table 1.** Data Set Characteristics

|                         | Training Data Set   | Validation Data Set | Testing Data Set    |
|-------------------------|---------------------|---------------------|---------------------|
| N                       | 101                 | 30                  | 100                 |
| Age (yr)                | 58 ± 14 (18–87)     | 53 ± 16 (20–85)     | 55 ± 14 (23–85)     |
| Sex (male/female)       | 44/57               | 15/15               | 39/61               |
| Weight (kg)             | 61 ± 9 (41–88)      | 62 ± 10 (47–88)     | 62 ± 11 (38–92)     |
| Height (cm)             | 161 ± 8 (140–180)   | 163 ± 10 (145–180)  | 162 ± 8 (144–186)   |
| Anesthesia duration (h) | 2.6 ± 1.7 (0.6–9.7) | 2.6 ± 1.7 (0.5–6.6) | 2.5 ± 1.6 (0.7–7.9) |
| Median BIS              | 44 ± 6 (31–64)      | 44 ± 6 (37–60)      | 44 ± 5 (34–57)      |
| Propofol                |                     |                     |                     |
| Total dose (g)          | 1.0 ± 0.6 (0.3–2.9) | 1.1 ± 0.8 (0.4–2.9) | 1.1 ± 0.7 (0.3–3.2) |
| Median Ce (µg/ml)       | 3.0 ± 0.5 (2.0–4.0) | 3.1 ± 0.4 (2.0–4.0) | 3.1 ± 0.5 (2.0–4.1) |
| Remifentanyl            |                     |                     |                     |
| Total dose (mg)         | 1.3 ± 1.3 (0.2–9.5) | 1.5 ± 1.4 (0.2–5.1) | 1.2 ± 1.1 (0.1–5.2) |
| Median Ce (ng/ml)       | 3.8 ± 1.0 (0.9–7.0) | 4.0 ± 0.9 (2.6–6.5) | 3.8 ± 1.0 (2.0–6.0) |

The data are numbers and means ± SD (range).

BIS = bispectral index; Ce = effect-site concentration.

**Table 2.** Comparison of Errors between the Deep Learning Model and the Response Surface Model during Three Anesthesia Periods

| Anesthesia Period | MDPE (%)      |                  | MDAPE (%)     |                  | RMSE          |                  |
|-------------------|---------------|------------------|---------------|------------------|---------------|------------------|
|                   | Deep Learning | Response Surface | Deep Learning | Response Surface | Deep Learning | Response Surface |
| All               | −0.1 ± 11.9   | 25.0 ± 17.6      | 13.9 ± 5.3    | 28.5 ± 14.3      | 9 ± 2         | 15 ± 4           |
| Induction         | −3.1 ± 14.6   | −15.7 ± 15.3     | 15.2 ± 7.3    | 22.6 ± 8.9       | 11 ± 4        | 19 ± 6           |
| Maintenance       | 1.1 ± 13.1    | 28.2 ± 19.1      | 14.1 ± 6.5    | 30.2 ± 16.8      | 9 ± 2         | 14 ± 5           |
| Recovery          | −5.3 ± 14.9   | 19.9 ± 21.0      | 14.8 ± 7.8    | 23.7 ± 16.8      | 11 ± 6        | 15 ± 6           |

The data are means ± SD. All values are significantly smaller in the deep learning model compared with the response surface model ( $P < 0.001$ ).

MDAPE = median absolute performance error; MDPE = median performance error; RMSE = root mean square error.

## Discussion

In the current study, we successfully developed an empirical model from dosing histories of propofol and remifentanyl and demographic data to predict BIS during TIVA through a deep learning approach. The deep learning model had less error in predicting BIS during the induction, maintenance, and recovery periods of anesthesia compared to the traditional mechanistic model.

The use of the artificial neural network to build prediction models is not uncommon in medical research. Steady-state plasma drug concentration was predicted with multilayer feed-forward neural network, which showed less prediction error than the nonlinear mixed effects modeling method.<sup>18</sup> An artificial neural network using 10 common clinical parameters predicted a BIS value of less than 60 after bolus injection of propofol more accurately than clinicians.<sup>19</sup> A simple feed-forward neural network predicted residual neuromuscular block using the degree of spontaneous neuromuscular recovery before reversal and the time elapsed after reversal.<sup>20</sup> The feed-forward neural network showed better performance in predicting the occurrence of postoperative nausea and vomiting<sup>21</sup> or hypotension after induction of general anesthesia<sup>22</sup> than traditional and statistical diagnostic models. The artificial neural network has also been extensively applied to interpret complicated data such as

electroencephalographic (EEG) signals. A feed-forward neural network was trained to build a novel index of anesthesia depth from raw EEG signal, which was comparable to a BIS value with correlation coefficient of 0.94.<sup>23</sup> A recurrent neural network was capable of differentiating three anesthetic states using preprocessed EEG with an accuracy as high as 99.6%.<sup>24</sup> A feed-forward neural network model that combined preprocessed EEG with multiple vital signs to build a new depth of anesthesia index was tested for prediction of anesthesia level, and the index showed less error and higher prediction accuracy than BIS.<sup>25</sup>

The pharmacodynamic drug interaction between propofol and remifentanyl has been traditionally explained by isobole and response surface models.<sup>14,15</sup> Recently, Short *et al.*<sup>14</sup> estimated BIS value from the propofol Ce and remifentanyl Ce using a response surface model. The predicted BIS showed good accordance with measured BIS with a MDPE of 8 ± 24% and a MDAPE of 25 ± 13%. However, the artificial neural network approach showed better performance than the traditional response surface model in predicting BIS during propofol and remifentanyl target-controlled infusions. Gambús *et al.*<sup>26</sup> adopted a fuzzy logic-based artificial neural network (Adaptive Neuro Fuzzy Inference System, ANFIS) to predict BIS from the combination of propofol Ce and remifentanyl Ce during sedation-analgesia

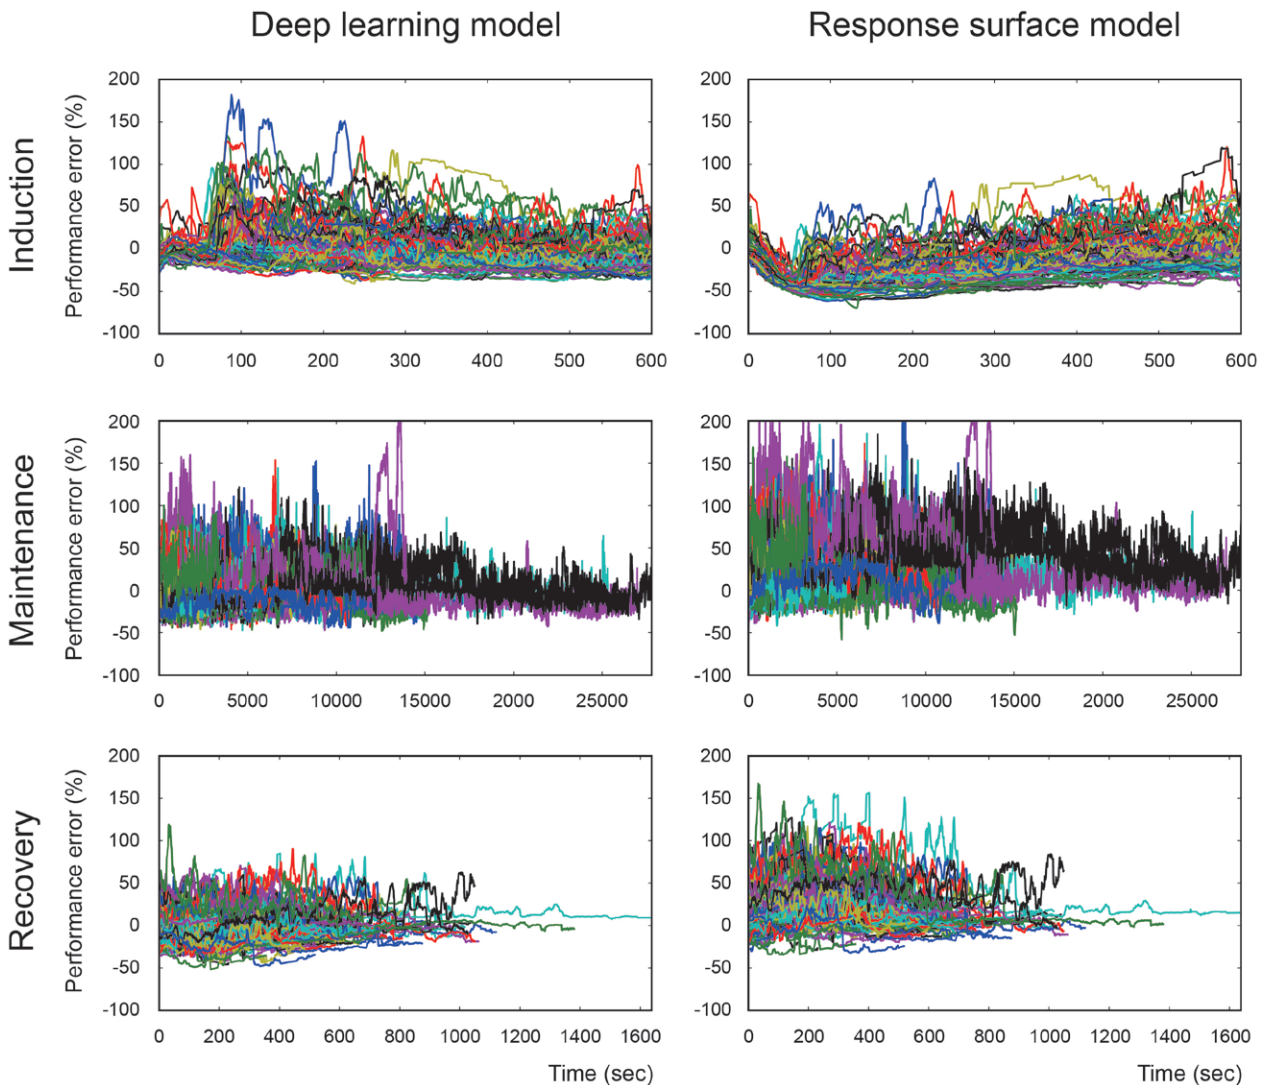

**Fig. 3.** Performance errors of deep learning model and response surface model during anesthesia induction, maintenance, and recovery periods. Performance errors were significantly smaller in the deep learning model compared to the response surface model during three periods of anesthesia ( $P < 0.001$ ).

for endoscopic procedure. MDPE, MDAPE, and RMSE were  $-5.83$ ,  $15.85$ , and  $13.25\%$ , respectively, in the validation group when procedural stimulus was present, which were far less than the errors in the study of Short *et al.*<sup>14</sup> In the current study, the performance of our model far surpasses the response surface model and ANFIS. Table 2 shows that the errors of our model were significantly smaller than those of response surface model during whole anesthesia periods. The errors of our model seem only slightly smaller than those of ANFIS. However, the ANFIS model was built using calculated  $C_e$ , which tends to be inaccurate in the dynamic phase, and was tested only in the steady state. The ANFIS model may be less applicable to induction and recovery periods of anesthesia. The superior predictive power of our model in the dynamic phase may come from the successful use of long short-term memory to process time-series data and appropriate interpretation of

pharmacodynamic drug interaction by the use of the feed-forward neural network.

Generally, the empirical model optimized for describing the data well has the disadvantage that there is no biologic basis, and parameter interpretation is difficult. Furthermore, the empirical model may have less predictive power than the mechanistic PK–PD model, because overfitting is likely to occur during complicated modeling using a large number of parameters. To address the weaknesses of empirical modeling, we designed a model architecture similar to the traditional mechanistic PK–PD model and used state-of-the-art computational methods such as deep learning. The long short-term memory in this study has a substantial difference as well as theoretical similarity from the traditional PK model. In the 180 consecutive input nodes of the long short-term memory, the previous time node affects the next time node, and the change in the amount of drug over time

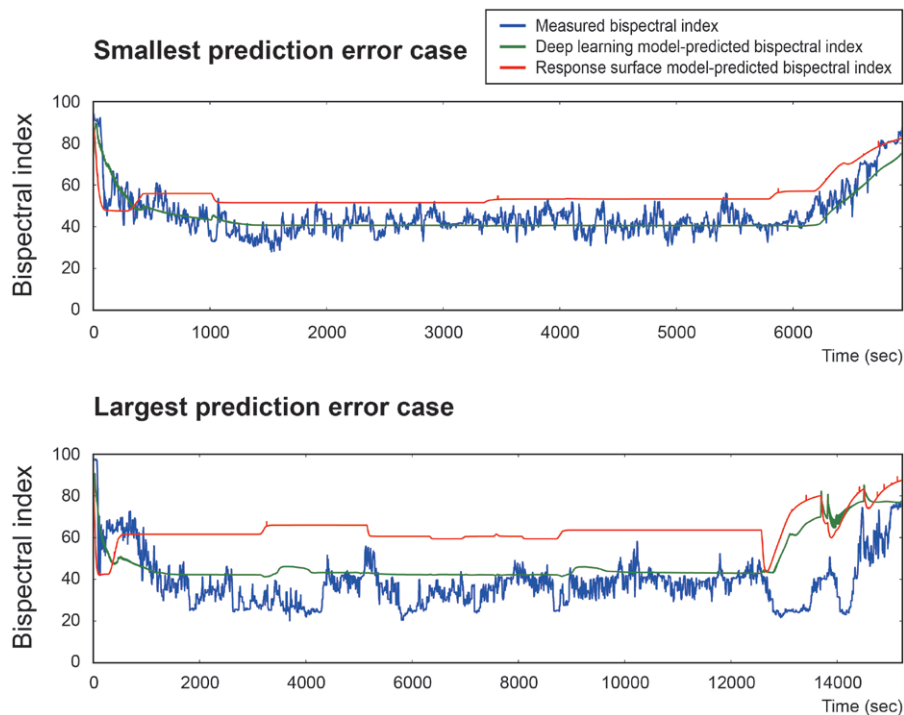

**Fig. 4.** Cases with the smallest and largest prediction errors predicted by deep learning. Measured and model-predicted bispectral index values are plotted. The root mean square errors of the cases with the smallest and largest prediction errors fitted by the deep learning model were 5.5 and 15.4, respectively.

in the final node is perfectly linear, as in the traditional PK model. However, our long short-term memory model calculates the computational intermediary in the virtual drug compartments without the assumption of pharmacokinetic intermediary like the plasma concentration or  $C_e$ , a source of error in traditional PK–PD models. The feed-forward neural network calculates the nonlinear dose-response relationship between the computational intermediary of propofol in the compartments and measured BIS. Contrary to a simple feed-forward neural network that performs a task similar to multiple linear regression analysis, a feed-forward neural network with a hidden layer can approximate any nonlinear functions by increasing the number of nodes in the layer.<sup>27</sup> In addition, the effect of covariates and the combined effect of propofol and remifentanyl were also estimated in the hidden layer of the feed-forward neural network. The covariates were entered in the PD part, which is more prone to error than the PK part, because it partially improved overall model performance in our preliminary test.

The main advantage of our deep learning model architecture is its extensibility in various aspects. First, the need for frequent blood sampling and drug concentration analysis, which is a major limitation of traditional PK–PD studies because of cost or ethical concerns, is not required. Because our deep learning model requires only dosing history and measured effect, PK–PD studies in vulnerable subjects may be more readily performed. Second, the effects of various covariates can be easily tested in our deep learning model. The high-dimensionality problem in traditional covariate modeling

can be eliminated because our model directly relates covariates with effect rather than PK–PD parameters.<sup>28</sup> Various covariates affecting propofol PK–PD, such as cardiac output and hemorrhage, can be readily added to input nodes of the feed-forward neural network and tested in the deep learning model.<sup>29,30</sup> Third, the combined effect of more than two drugs can be modeled by adding another long short-term memory inputs. Finally, it is a great extensibility option to use rapidly developing hardware, software, and algorithms in the field of machine learning. Furthermore, the clinical application of our study results may be considered. The BIS prediction curve can be drawn on the display of target-controlled infusion pump to guide optimal dosing of two synergistic drugs. The results of deep learning can be applied immediately to current target-controlled infusion devices, because, unlike learning process, low computer performance is enough to calculate the BIS from the inputs and node weights.<sup>31</sup>

However, our deep learning approach has some limitations. First, interpreting the deep learning results is difficult. Useful information from traditional PK–PD studies such as volume and clearance of each compartment, maximum effect, Hill coefficient, and fixed and random effects of covariates cannot be identified in the deep learning model. The weight value of each node, the result of the deep learning, is neither intuitive nor informative. We set up drug compartments similar to the assumptions of the PK model, but the interaction between the eight drug compartments, which were designed to improve performance, is still difficult to understand. Conflicts of interest in performance enhancement and



ease of understanding are difficult to solve in the empirical modeling. Second, the generalizability of the deep learning model is very dependent on the training data set. Nonlinear mixed effects modeling may predict values beyond the range of data used in the experiment through extrapolation, but the deep learning is less capable of estimating the values beyond the learned range. Adding more cases from different patient populations (*i.e.*, obesity), various infusion schemes, and repeated learning from the accumulated data will lead to a more robust model. Third, we cannot claim that the problem of serial correlation between the predicted BIS values is completely resolved by our model. Although the previous BIS value is not the input for the next BIS prediction, and the weight assignment for the time series input is optimized using the long short-term memory, learning could have been biased by unique output patterns during general anesthesia such as rapid decrease and gradual increase in BIS, which are typical during the induction and recovery phases, respectively. This problem may be improved by learning a variety of drug administration schemes and the resulting BIS patterns. Finally, unexpected situations in clinical practice like a change in the infusion rate of carrier fluid or the disconnection of fluid line might have reduced the performance of the deep learning model. Problems related to retrospective design may be solved by prospective studies or by increasing the number of cases.

In conclusion, our study demonstrated that the deep learning model is superior to traditional PK–PD model in predicting BIS during propofol and remifentanyl target-controlled infusions in surgical patients. The major advantage of the deep learning approach is its performance and extensibility. We expect that the accumulation of clinical big data will make the deep learning model more powerful and extend its application to a variety of clinical situations in the future.

## Research Support

Supported by the Department of Anesthesiology and Pain Medicine, Seoul National University College of Medicine, Seoul National University Hospital, Seoul, Korea.

## Competing Interests

The authors declare no competing interests.

## Correspondence

Address correspondence to Dr. Jung: Seoul National University College of Medicine, Seoul National University Hospital, 101 Daehak-ro, Jongno-gu, Seoul 03080, Korea. jungwoo@gmail.com. This article may be accessed for personal use at no charge through the Journal Web site, [www.anesthesiology.org](http://www.anesthesiology.org).

## References

1. Marsh B, White M, Morton N, Kenny GN: Pharmacokinetic model driven infusion of propofol in children. *Br J Anaesth* 1991; 67:41–8
2. Schnider TW, Minto CF, Gambus PL, Andresen C, Goodale DB, Shafer SL, Youngs EJ: The influence of method of administration and covariates on the pharmacokinetics of propofol in adult volunteers. *ANESTHESIOLOGY* 1998; 88:1170–82
3. Coppens M, Van Lommen JG, Schnider T, Wyler B, Bonte S, Dewaele F, Struys MM, Vereecke HE: Study of the time course of the clinical effect of propofol compared with the time course of the predicted effect-site concentration: Performance of three pharmacokinetic-dynamic models. *Br J Anaesth* 2010; 104:452–8
4. Björnsson MA, Norberg A, Kalman S, Karlsson MO, Simonsson US: A two-compartment effect site model describes the bispectral index after different rates of propofol infusion. *J Pharmacokinet Pharmacodyn* 2010; 37:243–55
5. Soehle M, Kuech M, Grube M, Wirz S, Kreuer S, Hoeft A, Bruhn J, Ellerkmann RK: Patient state index vs. bispectral index as measures of the electroencephalographic effects of propofol. *Br J Anaesth* 2010; 105:172–8
6. Jeleazcov C, Ihmsen H, Schmidt J, Ammon C, Schwilden H, Schüttler J, Fechner J: Pharmacodynamic modelling of the bispectral index response to propofol-based anaesthesia during general surgery in children. *Br J Anaesth* 2008; 100:509–16
7. Wiczling P, Bienert A, Sobczyński P, Hartmann-Sobczyńska R, Bieda K, Marcinkowska A, Małatyńska M, Kalisz R, Grześkowiak E: Pharmacokinetics and pharmacodynamics of propofol in patients undergoing abdominal aortic surgery. *Pharmacol Rep* 2012; 64:113–22
8. LeCun Y, Bengio Y, Hinton G: Deep learning. *Nature* 2015; 521:436–44
9. Minto CF, Schnider TW, Egan TD, Youngs E, Lemmens HJ, Gambus PL, Billard V, Hoke JF, Moore KH, Hermann DJ, Muir KT, Mandema JW, Shafer SL: Influence of age and gender on the pharmacokinetics and pharmacodynamics of remifentanyl: I. Model development. *ANESTHESIOLOGY* 1997; 86:10–23
10. Rumelhart DE, Widrow B, Lehr MA: The basic ideas in neural networks. *Commun ACM* 1994; 37:87–92
11. Shafer SL, Gregg KM: Algorithms to rapidly achieve and maintain stable drug concentrations at the site of drug effect with a computer-controlled infusion pump. *J Pharmacokinet Biopharm* 1992; 20:147–69
12. Struys MM, De Smet T, Depoorter B, Versichelen LF, Mortier EP, Dumortier FJ, Shafer SL, Rolly G: Comparison of plasma compartment *versus* two methods for effect compartment-controlled target-controlled infusion for propofol. *ANESTHESIOLOGY* 2000; 92:399–406
13. Cleveland WS: Robust locally weighted regression and smoothing scatterplots. *J Am Stat Assoc* 1979; 74:829–36
14. Short TG, Hannam JA, Laurent S, Campbell D, Misur M, Merry AF, Tam YH: Refining target-controlled infusion: An assessment of pharmacodynamic target-controlled infusion of propofol and remifentanyl using a response surface model of their combined effects on bispectral index. *Anesth Analg* 2016; 122:90–7
15. Bouillon TW, Bruhn J, Radulescu L, Andresen C, Shafer TJ, Cohane C, Shafer SL: Pharmacodynamic interaction between propofol and remifentanyl regarding hypnosis, tolerance of laryngoscopy, bispectral index, and electroencephalographic approximate entropy. *ANESTHESIOLOGY* 2004; 100:1353–72
16. Lin LI: A concordance correlation coefficient to evaluate reproducibility. *Biometrics* 1989; 45:255–68
17. Varvel JR, Donoho DL, Shafer SL: Measuring the predictive performance of computer-controlled infusion pumps. *J Pharmacokinet Biopharm* 1992; 20:63–94
18. Brier ME, Zurada JM, Aronoff GR: Neural network predicted peak and trough gentamicin concentrations. *Pharm Res* 1995; 12:406–12
19. Lin C-S, Li Y-C, Mok M s., Wu C-C, Chiu H-W, Lin Y-H: Neural network modeling to predict the hypnotic effect of propofol bolus induction. *Amia* 2002 2002:450–3

20. Laffey JG, Tobin E, Boylan JF, McShane AJ: Assessment of a simple artificial neural network for predicting residual neuromuscular block. *Br J Anaesth* 2003; 90:48–52
21. Peng SY, Wu KC, Wang JJ, Chuang JH, Peng SK, Lai YH: Predicting postoperative nausea and vomiting with the application of an artificial neural network. *Br J Anaesth* 2007; 98:60–5
22. Lin CS, Chang CC, Chiu JS, Lee YW, Lin JA, Mok MS, Chiu HW, Li YC: Application of an artificial neural network to predict postinduction hypotension during general anesthesia. *Med Decis Making* 2011; 31:308–14
23. Ortolani O, Conti A, Di Filippo A, Adembri C, Moraldi E, Evangelisti A, Maggini M, Roberts SJ: EEG signal processing in anaesthesia: Use of a neural network technique for monitoring depth of anaesthesia. *Br J Anaesth* 2002; 88:644–8
24. Srinivasan V, Eswaran C, Sriraam N: EEG based automated detection of anesthetic levels using a recurrent artificial neural network. *Int J Bioelectromagn* 2005; 7:267–70
25. Sadrawi M, Fan SZ, Abbod MF, Jen KK, Shieh JS: Computational depth of anesthesia via multiple vital signs based on artificial neural networks. *Biomed Res Int* 2015; 2015:536863
26. Gambús PL, Jensen EW, Jospin M, Borrat X, Martínez Pallí G, Fernández-Candil J, Valencia JF, Barba X, Caminal P, Trocóniz IF: Modeling the effect of propofol and remifentanyl combinations for sedation-analgesia in endoscopic procedures using an Adaptive Neuro Fuzzy Inference System (ANFIS). *Anesth Analg* 2011; 112:331–9
27. Hornik K: Approximation capabilities of multilayer feedforward networks. *Neural Networks* 1991; 4:251–7
28. Verotta D: Covariate modeling in population PK/PD models: An open problem. *Adv Pharmacoeconom Drug Safety* 2012; S1:006
29. Upton RN, Ludbrook GL, Grant C, Martinez AM: Cardiac output is a determinant of the initial concentrations of propofol after short-infusion administration. *Anesth Analg* 1999; 89:545–52
30. Johnson KB, Egan TD, Kern SE, McJames SW, Cluff ML, Pace NL: Influence of hemorrhagic shock followed by crystalloid resuscitation on propofol: A pharmacokinetic and pharmacodynamic analysis. *ANESTHESIOLOGY* 2004; 101:647–59
31. Beam AL, Kohane IS: Translating artificial intelligence into clinical care. *JAMA* 2016; 316:2368–9
